# Supplementary material for: A Molecularly Imprinted Polypyrrole/GO@Fe3O4 Nanocomposite Modified Impedimetric Sensor for the Routine Monitoring of Lysozyme
Source: MDPI journal article supplement (doi:10.3390/bios12090727), 2022-09-05
Supplement: s1 [file s1]

# A Molecularly Imprinted Polypyrrole/ $\text{GO@Fe}_3\text{O}_4$ Nanocomposite Modified Impedimetric Sensor for the Routine Monitoring of Lysozyme

Pablo Montoro-Leal, Isaac A. M. Frías, Elisa Vereda Alonso, Abdelhamid Errachid and Nicole Jaffrezic-Renault

## Supplementary material

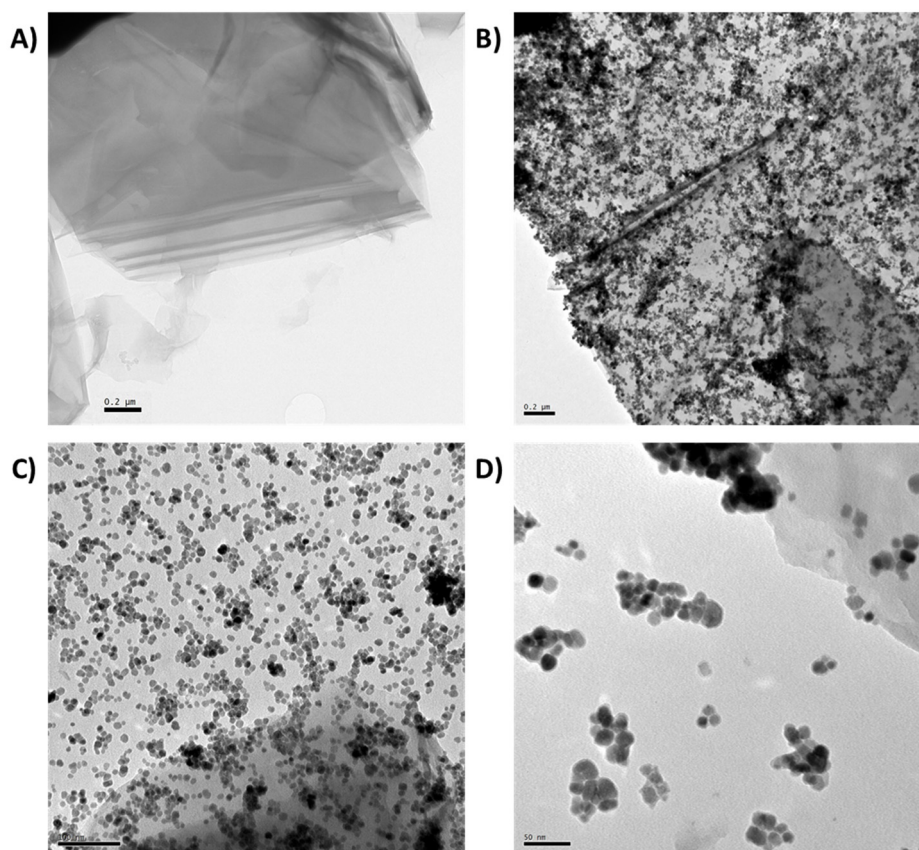

**Figure S1.** TEM images of A) GO (scale of 200 nm), and GO@ $\text{Fe}_3\text{O}_4$  with a scale of B) 200 nm, C) 100 nm and D) 50 nm.

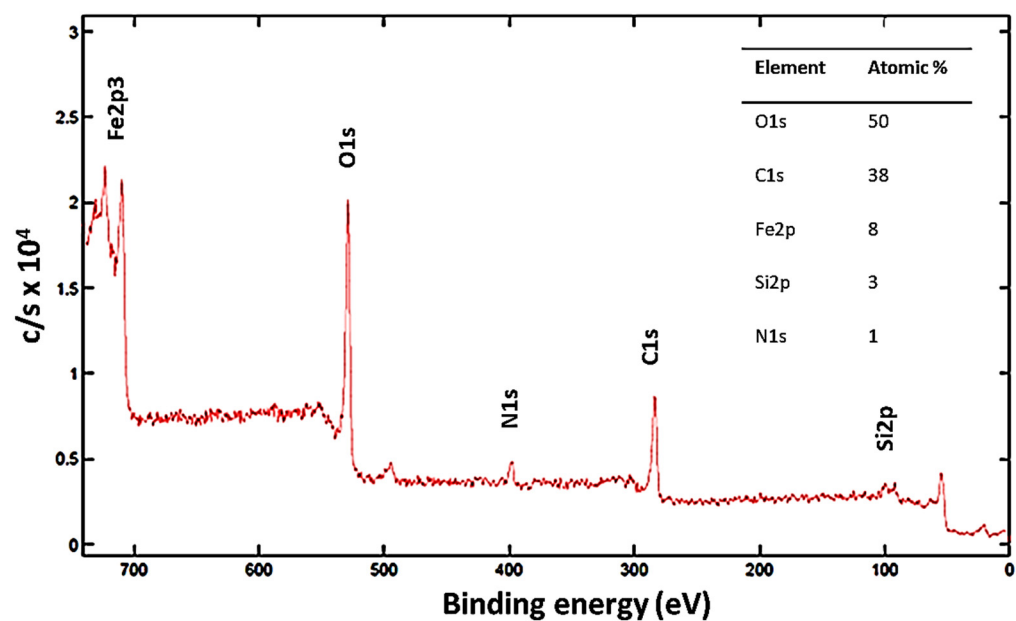

**Figure S2.** XPS spectra of GO@Fe<sub>3</sub>O<sub>4</sub> and atomic composition.

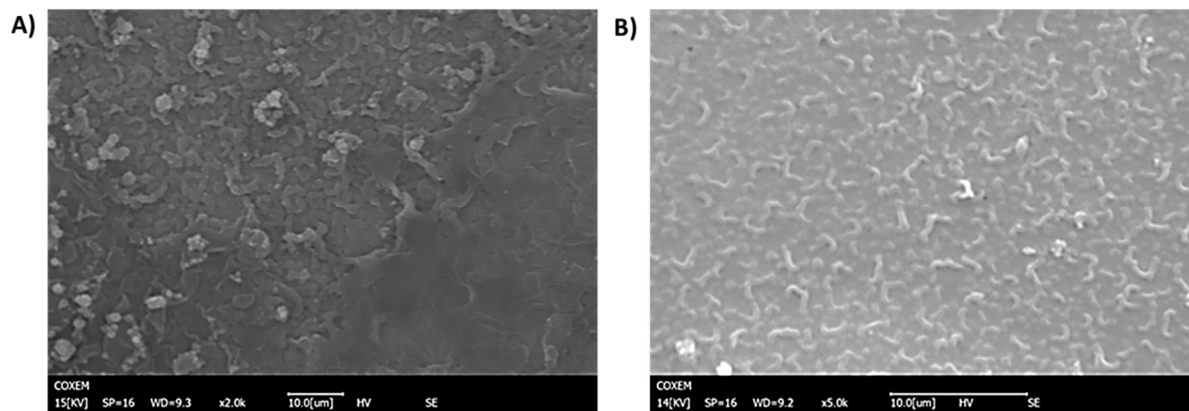

**Figure S3.** SEM images of PPy synthesized by electropolymerization A) prior to scan-rate optimization and b) under scan-rate optimized conditions (0.15 V/s).

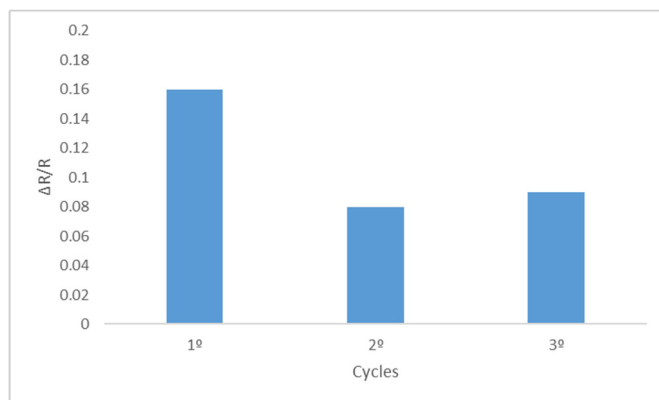

**Figure S4.** Reusability study results after three LYS 10 pg/mL incubation cycles.

**Table S1.** Average data for equivalent circuit of MIPPy/GO@Fe<sub>3</sub>O<sub>4</sub> impedimetric responses

| MIP [LYS] fg/mL | Rs     | CPE      | R <sub>CT</sub> | W     | ΔRCT   | ±    |
|-----------------|--------|----------|-----------------|-------|--------|------|
| 0               | 200.9  | 7.94E-09 | 228.2           | 63.8  | -      |      |
| 1.00E+01        | 205.7  | 1.19E-08 | 213.1           | 151.8 | 5.95   | 0.59 |
| 1.00E+02        | 199.8  | 1.14E-08 | 205.6           | 219.5 | 7.94   | 1.54 |
| 1.00E+03        | 205.5  | 6.10E-08 | 207.8           | 242.2 | 9.60   | 0.94 |
| 1.00E+04        | 199.9  | 5.88E-08 | 201.8           | 298.4 | 10.46  | 1.72 |
| 1.00E+05        | 203.8  | 4.63E-08 | 202.6           | 369.4 | 11.046 | 1.08 |
| 1.00E+06        | 205.6  | 2.44E-08 | 199.8           | 450.5 | 11.49  | 0.82 |
| 1.00E+07        | 205.8  | 1.55E-08 | 196.7           | 524.4 | 12.55  | 1.76 |
| 1.00E+08        | 204.51 | 1.24E-08 | 194.1           | 566   | 13.51  | 2.02 |

  

| MIP [BSA] fg/mL | Rs     | CPE      | R <sub>CT</sub> | W        | ΔRCT | ±    |
|-----------------|--------|----------|-----------------|----------|------|------|
| 0               | 426.55 | 3,69E-06 | 2.13E+09        | 2.12E+13 | -    |      |
| 1.00E+03        | 442.4  | 3,34E-06 | 7.04E+06        | 3.10E+13 | 81   | 0.34 |
| 1.00E+05        | 446.4  | 2,97E-06 | 4.52E+05        | 1.09E+11 | 311  | 0.80 |
| 1.00E+07        | 433.15 | 3,04E-06 | 1.83E+05        | 2.39E+10 | 55.8 | 0.47 |

  

| MIP [PEROX] fg/mL | Rs     | CPE         | R <sub>CT</sub> | W        | ΔRCT | ±     |
|-------------------|--------|-------------|-----------------|----------|------|-------|
| 0                 | 527.35 | 2.3384E-06  | 1.89E+05        | 9.47E+10 | -    |       |
| 1.00E+03          | 483.7  | 2.9059E-06  | 7.28E+06        | 1.12E+12 | 5300 | 17.67 |
| 1.00E+05          | 503.65 | 1.6976E-06  | 1.92E+09        | 4.52E+11 | 483  | 0.35  |
| 1.00E+07          | 483    | 2.02115E-06 | 1.16E+06        | 1.24E+11 | 780  | 0.78  |
